# Supplementary material
Source: publisher figshare collection journal article supplement (https://acs.figshare.com/ndownloader/files/22295523)
Supplement: Supplementary file 1 [file 22295523]

Archive with 6 entries (6 files):
- info.xml
- ml9b00666_high_quality.mp4
- 1802_Permission_for_Previously_Published_Copyrighted_Material.pdf
- ml9b00666.pdf
- model_1016.pdf
- photograph.pdf
