# Supplementary material
Source: publisher figshare collection journal article supplement (https://acs.figshare.com/ndownloader/files/22295523)
Supplement: Supplementary file 1 [file 22295523 › info.xml]

<presentation>
	<article>
		<title>Sulfonimide and Amide Derivatives as Novel PPAR&#x3b1; Antagonists: Synthesis, Antiproliferative Activity and Docking Studies</title>
		<doi>10.1021/acsmedchemlett.9b00666</doi>
		<copyright>American Chemical Society</copyright>
		<narrator>Alessandra Ammazzalorso</narrator>
		<contact>Alessandra Ammazzalorso</contact>
		<contact-email>alessandra.ammazzalorso@unich.it</contact-email>
		<author-list>
			<author>Alessandra Ammazzalorso</author>
		</author-list>
	</article>
	<slides height-width-ratio=".75">
		<slide audio-time="25">
			<subtitle/>
		</slide>
		<slide audio-time="73">
			<subtitle/>
		</slide>
		<slide audio-time="76">
			<subtitle/>
		</slide>
		<slide audio-time="134">
			<subtitle/>
		</slide>
		<slide audio-time="89">
			<subtitle/>
		</slide>
		<slide audio-time="71">
			<subtitle/>
		</slide>
		<slide audio-time="80">
			<subtitle/>
		</slide>
		<slide audio-time="43">
			<subtitle/>
		</slide>
	</slides>
	<audio duration="591"/>
</presentation>
