# Supplementary material
Source: publisher figshare collection journal article supplement (https://acs.figshare.com/ndownloader/files/22295523)
Supplement: Supplementary file 1 [file 22295523 › model_1016.pdf]

**Permission Request Form for Use of Individual and/or Group Photos  
in ACS LiveSlides from Copyright Owners/Publishers/Photographers  
Other Than ACS**

Date: 03/04/2020

To: DOMENICO SCARDETTA  
Publisher's/Copyright Owner's Contact Information

domenicascardeTTa@libero.it

Publisher's/Copyright Owner's Email Address

From: AMMAZZALORSO ALESSANDRA  
Your Name and Complete Mailing Address

alessandra.ammazzalorso@unich.it

VIA DEI VESTINI, CHIETI 66100  
ITALY

Your Phone Number Including Country and City Codes

Your Email Address

Your Specific Deadline Date

I am preparing an ACS LiveSlides entitled:

SULFONIMIDE AND AMIDE DERIVATIVES AS NOVEL PPAR $\alpha$  ANTAGONISTS: SYNTH  
to appear with ANTI PROLIFERATIVE ACTIVITY AND DOCKING STUDIES

ACS MED CHEM LETT. doi: 10.1021/acs.medchemlett.9b00666  
Title of ACS Publication and DOI

which is published by the American Chemical Society, a not-for-profit membership society and a STM signatory.

I would appreciate your permission to use the following material in all formats including but not limited to print, microform, electronic, and/or CD-ROM from the following reference:

**Individual Photographs of the Following Individuals:**

ALESSANDRA AMMAZZALORSO

**Collective Photograph (s) representing the following groups:**

If you, the photographer, have a required credit line, please include it below:

For your convenience, you may sign and date the bottom of this letter to indicate your agreement. Please return this form to me at the above email address, by the above deadline date (if given above). Thank you.

Agreed: Alessandra Ammazalorso  
Publisher's/Copyright Owner's Signature or Stamp

Date: 03/04/2020  
Date

**SIGN HERE**

Submit completed and signed form with your signed ACS LiveSlides Video Release. 7/25/16
